# Supplementary material for: An ultra-sensitive and selective nitrogen dioxide sensor based on a novel P2C2monolayer from a theoretical perspective
Source: Royal Society of Chemistry journal article supplement (doi:10.1039/c8nr05568h), 2018-01-01
Supplement: c8nr05568h1.pdf [file c8nr05568h1.pdf]

## Supplementary Information

### An Ultra-Sensitive and Selective Nitrogen Dioxide Sensor Based on Novel P<sub>2</sub>C<sub>2</sub> Monolayer from Theoretical Perspective

Jin Wang,<sup>a</sup> Jian-ming Lei,<sup>a</sup> Guo-feng Yang,<sup>b</sup> Jun-jun Xue,<sup>\*c</sup> Qing Cai,<sup>a</sup> Dun-jun Chen,<sup>\*a</sup> Hai Lu,<sup>a</sup> Rong Zhang,<sup>a</sup> and You-dou Zheng<sup>a</sup>

<sup>a</sup> Key Laboratory of Advanced Photonic and Electronic Materials, School of Electronic Science and Engineering, Nanjing University, Nanjing 210023, China

<sup>b</sup> School of Science, Jiangsu Provincial Research Center of Light Industrial Optoelectronic Engineering and Technology, Jiangnan University, Wuxi 214122, China.

<sup>c</sup> School of Electronic Science and Engineering, Nanjing University of Posts and Telecommunications, Nanjing 210023, China.

Table S1. Comparison of the adsorption energy, equilibrium distance, and Mulliken charge transfer of NO<sub>2</sub> adsorbed on P<sub>2</sub>C<sub>2</sub> monolayer (4×2 supercell, 11.67×16.36 Å<sup>2</sup>) and black phosphorene (BP) monolayer (3×4 supercell, 9.95×17.59 Å<sup>2</sup> for our calculation; 3×3 supercell for Ref. 1 and Ref. 2). The  $E_a$  value of NO<sub>2</sub> adsorption on P<sub>2</sub>C<sub>2</sub> monolayer is larger than that of NO<sub>2</sub> adsorption on BP, indicating that a higher level sensitivity for NO<sub>2</sub> detection with P<sub>2</sub>C<sub>2</sub> monolayer than that with BP.

| materials                     | $E_a$ (eV) | $d_0$ (Å) | $Q$ (e) |           |
|-------------------------------|------------|-----------|---------|-----------|
| P <sub>2</sub> C <sub>2</sub> | -1.318     | 2.02      | 0.117   | This work |
| BP                            | -0.556     | 2.33      | 0.115   | This work |
| BP                            | -0.50      | 2.27      | 0.185   | Ref. [1]  |
| BP                            | -0.62      | 2.2       | -       | Ref. [2]  |

Table S2. Comparison of the limit of detection (LOD), and sensitivity of NO<sub>2</sub> adsorbed on black phosphorene based sensors.

| materials     | LOD    | sensitivity   |          |
|---------------|--------|---------------|----------|
| BP flakes     | 20 ppb | -             | Ref. [3] |
| Multilayer BP | 5 ppb  | 20% (20 ppb)  | Ref. [4] |
| Multilayer BP | 20 ppb | 190% (20 ppb) | Ref. [5] |

Table S3. Comparison of the adsorption energy (calculated by Eq. (1)), equilibrium distance, and Mulliken charge transfer of different

gas molecules adsorbed on  $P_2C_2$  monolayer ( $4 \times 2$  supercell,  $11.67 \times 16.36 \text{ \AA}^2$ ) and black phosphorene (BP) ( $3 \times 3$  supercell).

| molecule | $E_a$ (eV)            |       |       | $Q$ (e)               |        |       | $d_o$ ( $\text{\AA}$ ) |       |       |
|----------|-----------------------|-------|-------|-----------------------|--------|-------|------------------------|-------|-------|
|          | This work( $P_2C_2$ ) | Ref.1 | Ref.2 | This work( $P_2C_2$ ) | Ref.1  | Ref.2 | This work( $P_2C_2$ )  | Ref.1 | Ref.2 |
| $CO_2$   | -0.396                | -     | -0.41 | -0.023                | -      | -0.04 | 3.09                   | -     | 2.69  |
| $H_2$    | -0.158                | -0.13 | -     | 0.018                 | -0.013 | -     | 3.15                   | 2.46  | -     |
| $H_2O$   | -0.364                | -0.14 | -     | -0.036                | -0.035 | -     | 3.16                   | 2.71  | -     |
| $N_2$    | -0.385                | -     | -     | -0.017                | -      | -     | 3.16                   | -     | -     |
| $NH_3$   | -0.483                | -0.18 | -0.50 | -0.032                | -0.050 | -     | 3.19                   | 2.59  | 2.14  |
| $O_2$    | -0.423                | -0.27 | -     | -0.026                | 0.064  | -     | 3.02                   | 2.76  | -     |
| $NO_2$   | -1.318                | -0.50 | -0.62 | 0.117                 | 0.185  | -     | 2.02                   | 2.27  | 2.2   |

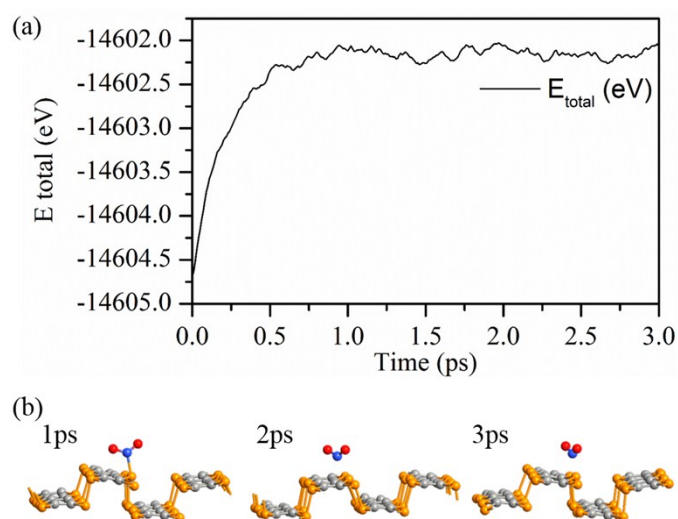

**Fig S1.** Molecular dynamics simulation results for  $NO_2$ -adsorbed  $P_2C_2$  monolayers at  $T = 300 \text{ K}$ . (a): total energy fluctuations with time; (b): structural configurations after 1ps, 2ps, and 3ps. We evaluated the thermal stability of  $NO_2$ -adsorbed systems at  $300 \text{ K}$  for 3 ps with a time step of 1 fs by performing the first-principle molecular dynamics (MD) simulations with the moles–volume–temperature (NVT) Berendsen ensemble.<sup>6</sup> It can be seen that the fluctuations of energy with time retain around a certain constant. Moreover,  $NO_2$ -adsorbed system does not suffer pronounced structural distortion or transformation, as shown in Fig. S1(b). Our calculation results reveal that  $NO_2$ -adsorbed  $P_2C_2$  monolayer is thermally stable at room temperature.

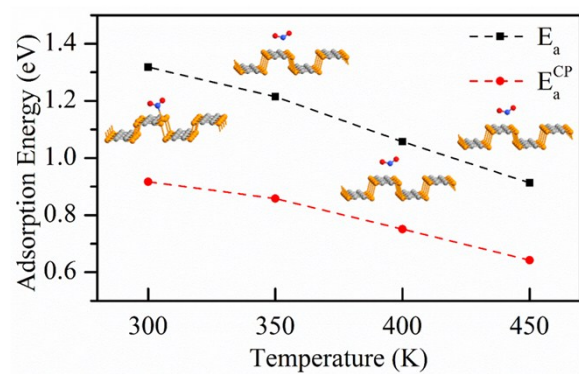

**Fig S2.** Adsorption energies of NO<sub>2</sub> adsorbed on monolayer P<sub>2</sub>C<sub>2</sub> as a function of temperature.

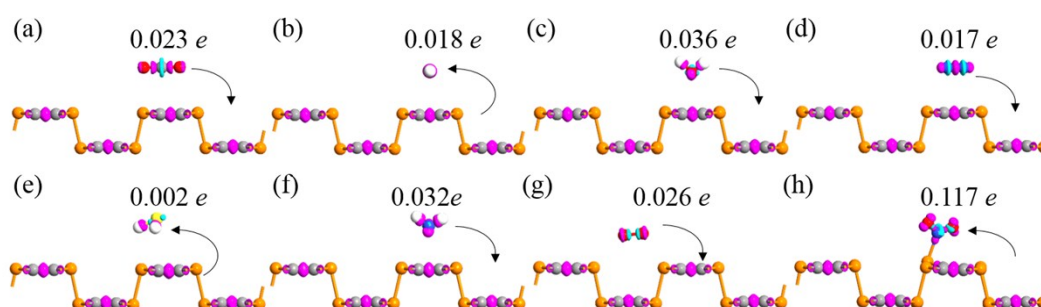

**Fig S3.** The side views of electron difference densities (EDD) calculation for (a) CO<sub>2</sub>, (b) H<sub>2</sub>, (c) H<sub>2</sub>O, (d) N<sub>2</sub> (e) H<sub>2</sub>S (f) NH<sub>3</sub>, (g) O<sub>2</sub> and (h) NO<sub>2</sub> adsorbed on the P<sub>2</sub>C<sub>2</sub> monolayer. The isovalue is 0.2 eV/Å<sup>3</sup>. The direction of charge transfer is shown by the arrow.

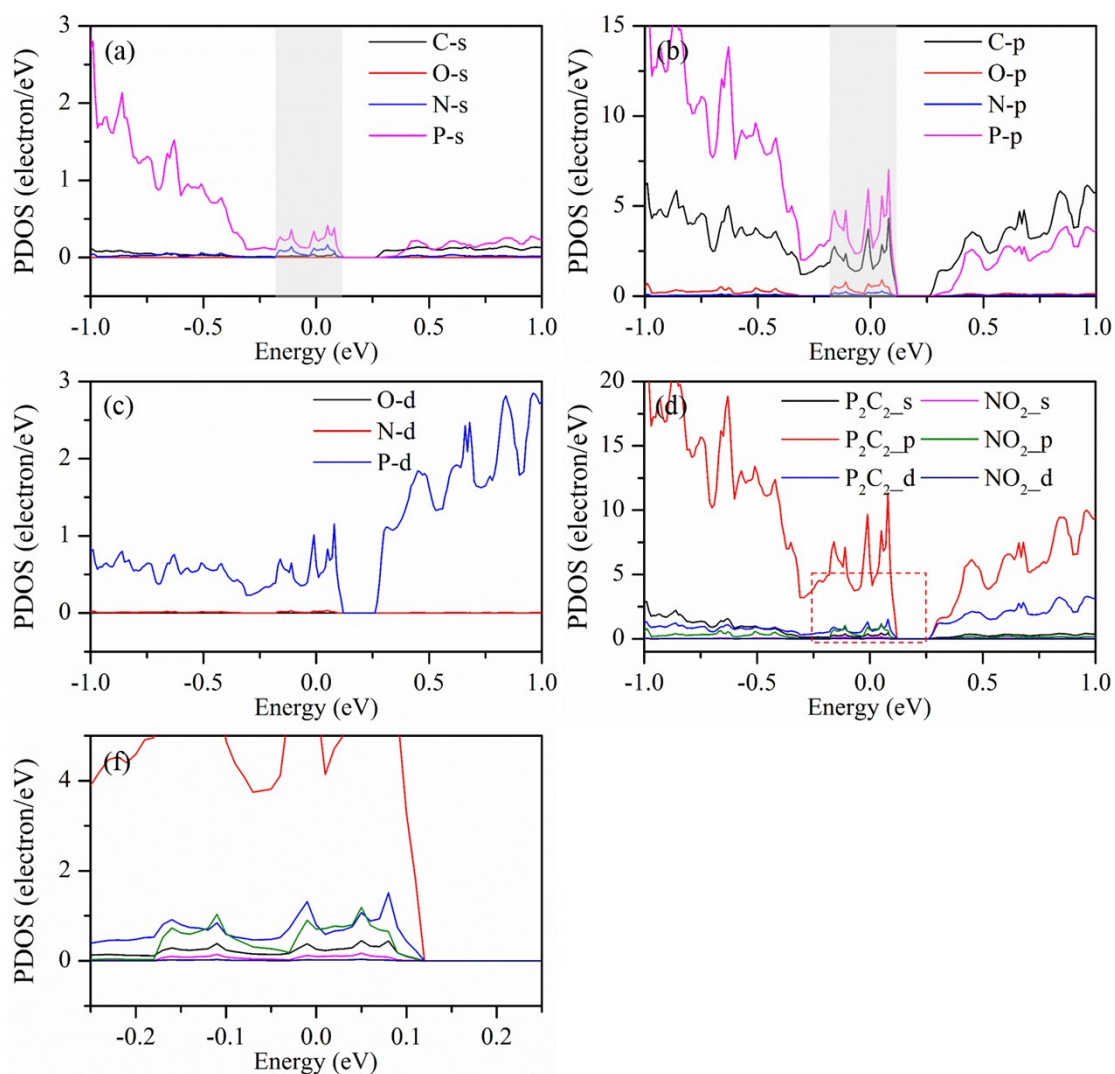

**Fig S4.** (a-f) The PDOS of NO<sub>2</sub> molecule adsorbed on P<sub>2</sub>C<sub>2</sub> monolayer system. (f) is zoomed from (d) as indicated by red rectangle dotted line. The Fermi energy is set at zero.

## References

1. Y. Cai, Q. Ke, G. Zhang, Y.-W. Zhang, *Journal of Physical Chemistry C*, 2015, **119**, 3102-3110.
2. L. Kou, T. Frauenheim, C. Chen, *Journal of Physical Chemistry Letters*, 2014, **5**, 2675-2681.
3. M. Donarelli, L. Ottaviano, L. Giancaterini, G. Fioravanti, F. Perrozzi, C. Cantalini, *2d Materials*, 2016, **3**, 025002.
4. A.N. Abbas, B.L. Liu, L. Chen, Y.Q. Ma, S. Cong, N. Aroonyadet, M. Kopf, T. Nilges, C.W. Zhou, *Acs Nano*, 2015, **9**, 5618-5624.
5. S. Cui, H. Pu, S.A. Wells, Z. Wen, S. Mao, J. Chang, M.C. Hersam, J. Chen, *Nature Communications*, 2015, **6**, 8632.
6. J. C. Berendsen, J. P. M. Postma, W. F. van Gunsteren, A. DiNola, J. R. Haak, *The Journal of Chemical Physics*, 1982, **81**, 3684.
